# Supplementary figures and images for: Gastrointestinal flora and gastrointestinal status in children with autism – comparisons to typical children and correlation with autism severity
Source: Springer Nature journal article supplement (doi:10.1186/1471-230x-11-22), 2011-03-16

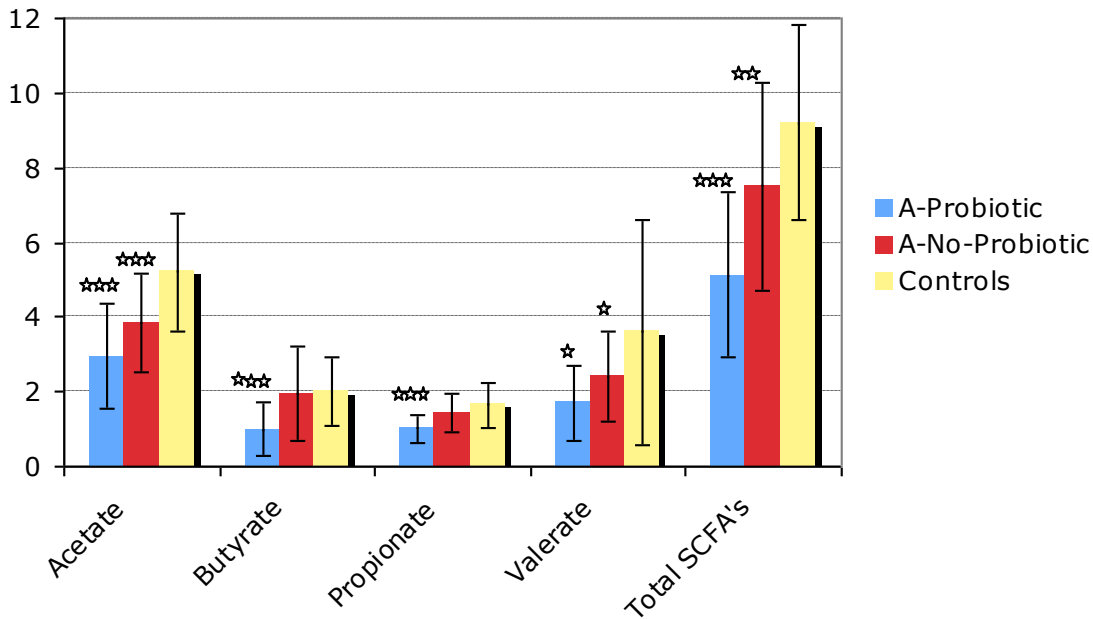

Supplement: 12876_2010_560_MOESM1_ESM.pdf [file 12876_2010_560_MOESM1_ESM.pdf]

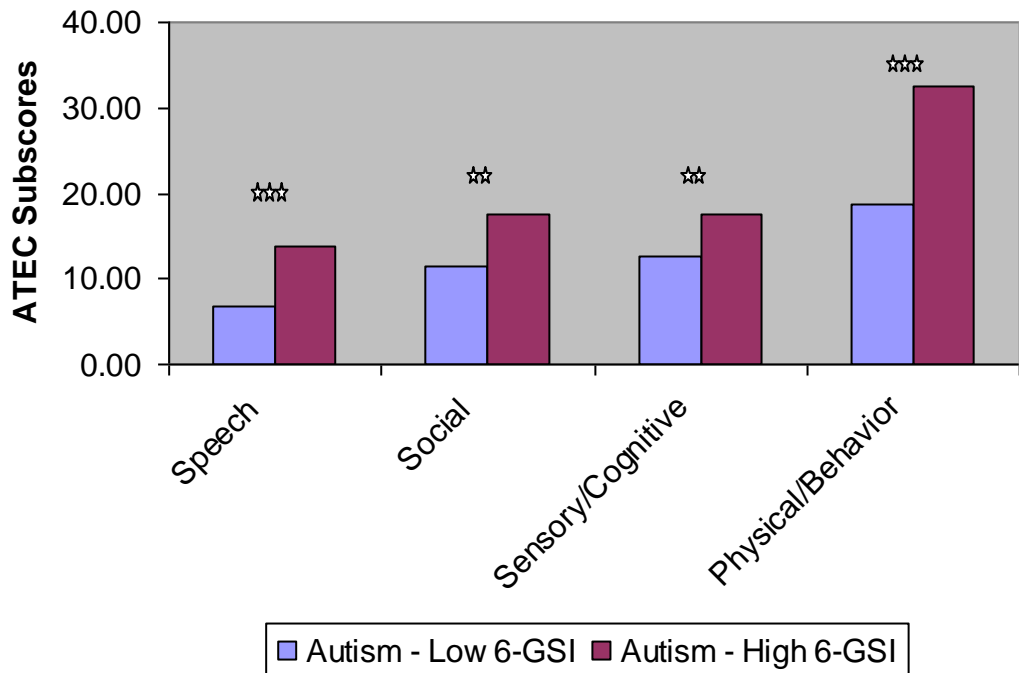

Supplement: 12876_2010_560_MOESM2_ESM.pdf [file 12876_2010_560_MOESM2_ESM.pdf]

**6-GSI vs. total ATEC**

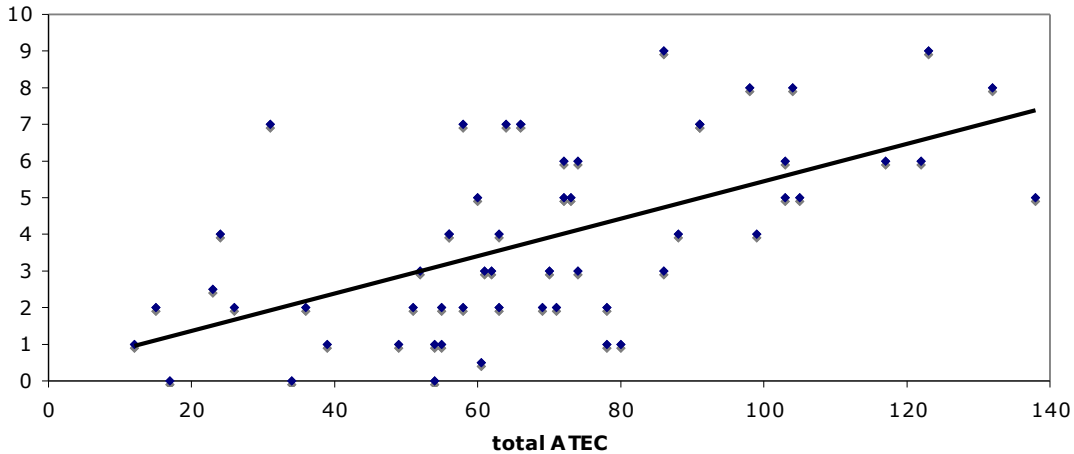

Supplement: 12876_2010_560_MOESM3_ESM.pdf [file 12876_2010_560_MOESM3_ESM.pdf]
